# Supplementary material
Source: PubMed Central journal article supplement (PMC3694615)
Supplement: NIHMS436121-supplement-1_si_001.pdf [file NIHMS436121-supplement-1_si_001.pdf]

# Supplementary information to: “A variational linear-scaling framework to build practical, efficient next-generation orbital-based quantum force fields”

Timothy J. Giese, Haoyuan Chen, Thakshila Dissanayake, George M. Giambaşu, Hugh Heldenbrand, Ming Huang, Erich R. Kuechler, Tai-Sung Lee, Maria T. Panteva, Brian K. Radak, and Darrin M. York\*

*BioMaPS Institute and Department of Chemistry and Chemical Biology, Rutgers University, Piscataway, NJ 08854-8087 USA*

E-mail: york@biomaps.rutgers.edu

Table 1: Parameters

| Parameter      | H     | O    |
|----------------|-------|------|
| $M_{sp}^{(1)}$ | ...   | -1.0 |
| $M_{pp}^{(2)}$ | ...   | 4.1  |
| $s$            | 1.35  | 23.2 |
| $\zeta_a(0)$   | 200.0 | 2.6  |
| $h$            | 0.0   | 0.0  |
| $\alpha_a(0)$  | 0.1   | 0.1  |
| $f$            | 0.0   | 0.0  |

---

\*To whom correspondence should be addressed
